# Supplementary material
Source: MDPI journal article supplement (https://www.mdpi.com/2311-7524/9/8/940)
Supplement: s1 [file s1]

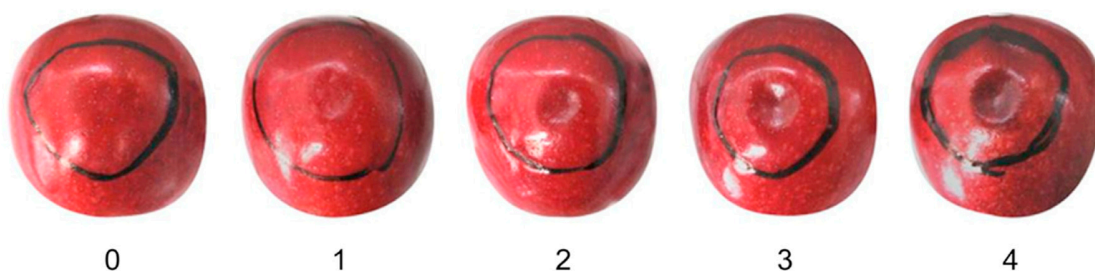

**Figure S1.** Scale to visually assess surface pitting: 0 = no pitting; 1 = light pitting; 2 = moderate pitting; 3 = severe pitting; and 4 = very severe pitting [45].

45. Param, N., & Zoffoli, J.P. (2016). Genotypic differences in sweet cherries are associated with the susceptibility to mechanical damage. *Scientia Horticulturae*, 211, 410–419. <https://doi.org/10.1016/j.scienta.2016.09.027>.

**Table S1.** Targeted and untargeted metabolites of sweet cherry fruit after induced surface pitting treated with melatonin and without melatonin (control) and stored at 1 °C and 95% RH for 0, 10, and 20 d.

|                                                    | Control |      |      | Melatonin |      |      |
|----------------------------------------------------|---------|------|------|-----------|------|------|
|                                                    | 0 d     | 10 d | 20 d | 0 d       | 10 d | 20 d |
| <b>Targeted metabolites (mg g<sup>-1</sup>)</b>    |         |      |      |           |      |      |
| p-coumaric acid derivate 1                         | 4.73    | 5.05 | 4.66 | 4.57      | 5.22 | 5.05 |
| Chlorogenic acid                                   | 1.83    | 1.89 | 1.84 | 1.95      | 2.10 | 2.08 |
| Rutin derivate 1                                   | 0.13    | 0.13 | 0.12 | 0.11      | 0.12 | 0.12 |
| Rutin derivate 2                                   | 0.41    | 0.59 | 0.64 | 0.41      | 0.51 | 0.56 |
| Chlorogenic acid derivate                          | 0.08    | 0.12 | 0.12 | 0.07      | 0.10 | 0.10 |
| 2-Hydroxycinnamic-O-coumaric acid                  | 0.01    | 0.02 | 0.01 | 0.02      | 0.02 | 0.01 |
| Caffeic acid, expressed as 2-hydroxycinnamic acid  | 0.13    | 0.15 | 0.15 | 0.13      | 0.15 | 0.16 |
| <b>Untargeted metabolites (relative abundance)</b> |         |      |      |           |      |      |
| Cyanidin 3-glucoside                               | 50.5    | 57.6 | 94.7 | 74.8      | 71.5 | 92.3 |
| Benzene                                            | 21.4    | 8.9  | 11.5 | 4.3       | 2.9  | 3.7  |
| L-Serine                                           | 8.0     | 6.6  | 7.0  | 9.4       | 5.4  | 8.5  |
| L-Threonine                                        | 9.0     | 6.8  | 7.9  | 8.5       | 4.2  | 11.1 |
| L-Aspartic acid                                    | 7.6     | 6.2  | 6.2  | 10.5      | 7.6  | 6.5  |
| Mannobiose                                         | 7.5     | 5.2  | 4.9  | 1.8       | 3.2  | 0.6  |
| Butylphosphonic acid                               | 11.0    | 6.7  | 9.1  | 6.1       | 6.0  | 5.3  |
| Palmitic Acid                                      | 8.3     | 7.3  | 7.4  | 8.3       | 7.9  | 8.1  |
| Myo-Inositol                                       | 8.9     | 9.0  | 9.2  | 9.6       | 6.9  | 6.8  |
| Caffeic acid                                       | 8.5     | 10.2 | 8.4  | 9.7       | 7.9  | 7.7  |
| D-Allose                                           | 8.9     | 9.4  | 8.4  | 10.6      | 9.0  | 7.7  |
| Silane                                             | 10.7    | 11.1 | 8.5  | 14.1      | 5.7  | 5.5  |
| D-mannose                                          | 10.0    | 6.3  | 7.8  | 7.6       | 6.5  | 12.4 |
| Beta-D-Glucopyranuronic acid                       | 8.6     | 8.7  | 8.7  | 10.2      | 9.0  | 7.6  |
| 1-Tetradecanol                                     | 9.3     | 8.5  | 9.2  | 9.9       | 7.7  | 8.5  |
| Sucrose                                            | 8.6     | 7.5  | 7.9  | 6.6       | 9.1  | 8.4  |
| Pyrocatechol                                       | 8.0     | 8.7  | 9.4  | 9.7       | 9.2  | 6.8  |
| D-cellobiose                                       | 8.8     | 9.1  | 8.9  | 9.1       | 7.2  | 6.7  |
| Galactitol                                         | 7.4     | 8.6  | 9.2  | 12.4      | 6.7  | 4.7  |
| benzenamine                                        | 7.4     | 7.6  | 7.1  | 10.1      | 8.1  | 8.6  |
| 3-O-Coumaroyl-D-quinic acid                        | 9.0     | 12.2 | 8.4  | 19.9      | 13.1 | 12.1 |
| Melibiose                                          | 6.8     | 8.9  | 7.1  | 11.1      | 9.5  | 8.7  |
| Sitosterol                                         | 8.2     | 8.3  | 8.7  | 8.9       | 7.3  | 7.7  |
| L-Proline                                          | 8.5     | 6.7  | 5.2  | 13.3      | 4.5  | 4.3  |
| Malic acid                                         | 8.1     | 7.2  | 8.0  | 8.7       | 8.0  | 8.0  |

|                      |     |      |     |      |     |      |
|----------------------|-----|------|-----|------|-----|------|
| Asparagine           | 7.8 | 6.0  | 5.0 | 8.2  | 6.5 | 9.4  |
| D-Fructose           | 8.3 | 8.2  | 8.3 | 9.2  | 7.8 | 7.9  |
| Beta-D-Glucose       | 1.4 | 11.1 | 7.7 | 11.1 | 7.2 | 5.3  |
| Glucose              | 8.5 | 8.3  | 8.4 | 9.3  | 7.9 | 7.9  |
| D-Glucitol           | 8.3 | 7.9  | 8.3 | 9.4  | 7.9 | 7.7  |
| Maltose              | 6.2 | 7.1  | 8.4 | 9.3  | 7.4 | 6.4  |
| Allose               | 1.6 | 10.  | 7.7 | 10.5 | 7.1 | 5.3  |
| Methyl galactoside   | 7.7 | 5.0  | 5.2 | 9.4  | 8.6 | 7.8  |
| d-Xylose             | 7.4 | 8.0  | 7.8 | 11.4 | 7.4 | 5.2  |
| 2-aminobutanoic acid | 6.9 | 7.4  | 6.6 | 9.8  | 6.4 | 11.2 |
| Pipecolic acid       | 8.3 | 6.5  | 7.2 | 8.7  | 6.7 | 7.1  |
| Glyceric acid        | 8.7 | 7.9  | 9.1 | 8.7  | 8.3 | 8.4  |

**Table S2.** Metabolic pathways and regulation that showed significance at 0, 10, and 20 days of cold storage in sweet cherry with induced mechanical damage.

| <b>Time of cold storage</b> | <b>Metabolic pathway</b>                              | <b>Regulation*</b> | <b>P value</b> | <b>FDR</b> |
|-----------------------------|-------------------------------------------------------|--------------------|----------------|------------|
| <b>0 d</b>                  | Phenylpropanoid biosynthesis                          | Up                 | 0.009          | 0.32       |
|                             | Stilbenoid, diarylheptanoid and gingerol biosynthesis | Up                 | 0.045          | 0.50       |
|                             | Flavonoid biosynthesis                                | Up                 | 0.045          | 0.50       |
|                             | Anthocyanin biosynthesis                              | Up                 | 0.053          | 0.50       |
| <b>10 d</b>                 | Sphingolipid metabolism                               | Up                 | 0.028          | 0.50       |
|                             | Sulfur metabolism                                     | Up                 | 0.280          | 0.50       |
| <b>20 d</b>                 | Amino sugar and nucleotide sugar metabolism           | Down               | 0.050          | 0.48       |

\* Up and down are referred to the metabolites involved in that pathways are up- or down-regulated after to melatonin treatment compared to the control.
